# Supplementary material
Source: Elsevier journal article supplement (https://www.sciencedirect.com/science/article/pii/S0211699522000789)
Supplement: mmc1 [file S0211699522000789:mmc1.doc]

Tabla suplementaria 1. Perfil de tratamiento durante los 12 meses de seguimiento en pacientes con anemia tratados con AEE

|  | ERC-ND (3a-5)  con anemia y AEE  n=5.413 | ERC-ND (3a)  con anemia y AEE  n=1.408 | ERC-ND (3b)  con anemia y AEE  n=1.897 | ERC-ND (4)  con anemia y AEE  n=1.591 | ERC-ND (5)  con anemia y AEE  n=517 | ERC-D  con anemia y AEE  n=303 | ERC-D con anemia en hemodiálisis y AEE  n=202 | ERC-D con anemia en diálisis peritoneal y AEE  n=101 |
| --- | --- | --- | --- | --- | --- | --- | --- | --- |
| Patrones de tratamiento asociados a las cohortes durante el seguimiento de 12 meses, n (%) | | | | | | | | |
| Hierro oral | 1.403 (25,9) | 322 (22,9) | 485 (25,6) | 457 (28,7) | 139 (26,9) | 26 (8,6) | 7 (3,5) | 19 (18,8) |
| Hierro IV | 668 (12,3) | 155 (11,0) | 182 (9,6) | 228 (14,3) | 103 (19,9) | 181 (59,7) | 152 (75,3) | 29 (28,7) |
| Tratamiento AEE | 5.413 (100,0) | 1.408 (100,0) | 1.897 (100,0) | 1.591 (100,0) | 517 (100,0) | 303 (100,0) | 202 (100,0) | 101 (100,0) |
| Número y proporción de pacientes con cada régimen de tratamiento durante el seguimiento de 12 meses, n (%) | | | | | | | | |
| Tratamiento AEE | 3.378 (62,4) | 937 (66,6) | 1.241 (65,4) | 925 (58,1) | 275 (53,2) | 104 (34,3) | 49 (24,3) | 55 (54,5) |
| Hierro oral e IV | 0 (0,0) | 0 (0,0) | 0 (0,0) | 0 (0,0) | 0 (0,0) | 0 (0,0) | 0 (0,0) | 0 (0,0) |
| Hierro oral y AEE | 1.367 (25,3) | 316 (22,4) | 474 (25,0) | 438 (27,5) | 139 (26,9) | 18 (5,9) | 1 (0,5) | 17 (16,8) |
| Hierro IV y AEE | 632 (11,7) | 149 (10,6) | 171 (9,0) | 209 (13,1) | 103 (19,9) | 173 (57,1) | 146 (72,3) | 27 (26,7) |
| Hierro oral, IV y AEE | 36 (0,7) | 6 (0,4) | 11 (0,6) | 19 (1,2) | 0 (0,0) | 8 (2,6) | 6 (3,0) | 2 (2,0) |

AEE: agentes estimuladores de la eritropoyesis; D: en diálisis; ERC: enfermedad renal crónica; IV: intravenoso; ND: no en diálisis

Tabla suplementaria 2. Tipo de tratamiento con agentes estimuladores de eritropoyesis en pacientes anémicos durante el seguimiento

|  | ERC-ND (3a-5)  con anemia  n=5.413 | ERC-ND (3a)  con anemia  n=1.408 | ERC-ND (3b)  con anemia  n=1.897 | ERC-ND (4)  con anemia  n=1.591 | ERC-ND (5)  con anemia  n=517 | ERC-D  con anemia  n=303 | ERC-D con anemia en hemodiálisis  n=202 | ERC-D con anemia en diálisis peritoneal  n=101 |
| --- | --- | --- | --- | --- | --- | --- | --- | --- |
| Eritropoetina | 2.520 (46,6) | 677 (48,1) | 894 (47,1) | 696 (43,8) | 253 (48,9) | 140 (46,2) | 95 (47,0) | 45 (44,6) |
| Darbepoetina alfa | 1.627 (30,1) | 403 (28,6) | 566 (29,8) | 502 (31,6) | 156 (30,2) | 91 (30,0) | 57 (28,2) | 34 (33,7) |
| MPG-epoetina beta | 1.266 (23,4) | 328 (23,3) | 437 (23,0) | 393 (24,7) | 108 (20,9) | 72 (23,8) | 50 (24,8) | 22 (21,8) |

AEE: agentes estimuladores de la eritropoyesis; D: en diálisis; ERC: enfermedad renal crónica; ND: no en diálisis

Tabla suplementaria 3. Dosis media de agentes estimuladores de eritropoyesis en pacientes anémicos

|  | Darbepoetina (µg/kg/mes), media (DE) | Epoetina alfa (UI/kg/semana), media (DE) | MPG-epoetina beta (µg/kg/mes), media (DE) |
| --- | --- | --- | --- |
| ERC-ND (3a-5) | 2,7 (1,8) | 162,2 (94,7) | 2,1 (1,2) |
| ERC-D | 3,3 (1,8) | 212,7 (117,5) | 2,4 (1,2) |

D: en diálisis; DE: desviación estándar; ERC: enfermedad renal crónica; ND: no en diálisis; UI: unidades internacionales
